# Supplementary material for: Ambient effects on electrical characteristics of CVD-grown monolayer MoS2 field-effect transistors
Source: Springer Nature journal article supplement (doi:10.1038/s41598-017-04350-z), 2017-06-16
Supplement: MOESM1 [file 41598_2017_4350_MOESM1_ESM-2g5sisf.pdf]

## **Supplementary Information**

### **Ambient effects on electrical characteristics of CVD-grown monolayer MoS<sub>2</sub> field-effect transistors**

Jae-Hyuk Ahn,<sup>1,2</sup> William M. Parkin,<sup>1</sup> Carl H. Naylor,<sup>1</sup> A. T. Charlie Johnson,<sup>1</sup> and Marija Drndić<sup>1,a)</sup>

<sup>1</sup> *Department of Physics and Astronomy, University of Pennsylvania, Philadelphia, Pennsylvania 19104, United States*

<sup>2</sup> *Department of Electronic Engineering, Kwangwoon University, Seoul 01897, South Korea*

---

<sup>a)</sup> Author to whom correspondence should be addressed. Electronic mail: [drndic@physics.upenn.edu](mailto:drndic@physics.upenn.edu)

## Reproducibility of a pressure-dependent, non-monotonic change trend in threshold voltage

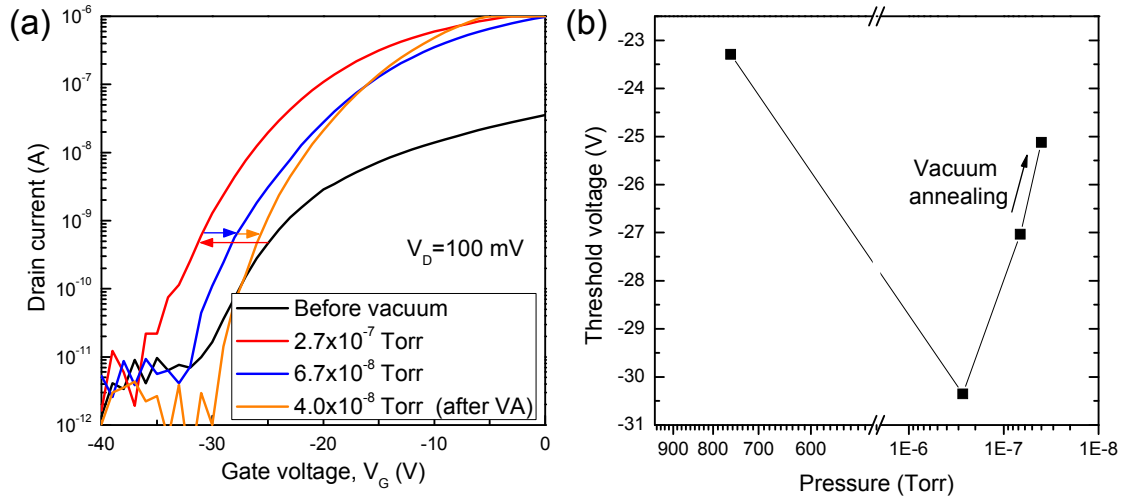

**Figure S1.** Dependence of pressure and vacuum annealing on threshold voltage (a) Transfer characteristics ( $I_D$ - $V_G$ ) of a monolayer MoS<sub>2</sub> FET with different ambient conditions. First, the  $I_D$ - $V_G$  curve is shifted in the negative direction (from black to red) as the pressure is reduced to  $2.7 \times 10^{-7}$  Torr. Then, the curve is moved back to the positive side (from red to blue) with decreasing pressure to  $6.7 \times 10^{-8}$  Torr and shifted further in the positive direction (from blue to orange) by vacuum annealing (denoted as VA). (b) Threshold voltage with respect to the pressure, which is extracted from the transfer curves in Figure (a). The threshold voltage is reduced with decreasing pressure but increased again, showing a pressure-dependent, non-monotonic change in threshold voltage which is discussed in detail in the main text. In addition, further increase of the threshold voltage is observed after vacuum annealing.

**Effects of vacuum annealing on electrical characteristics of MoS<sub>2</sub> FETs with different contact materials**

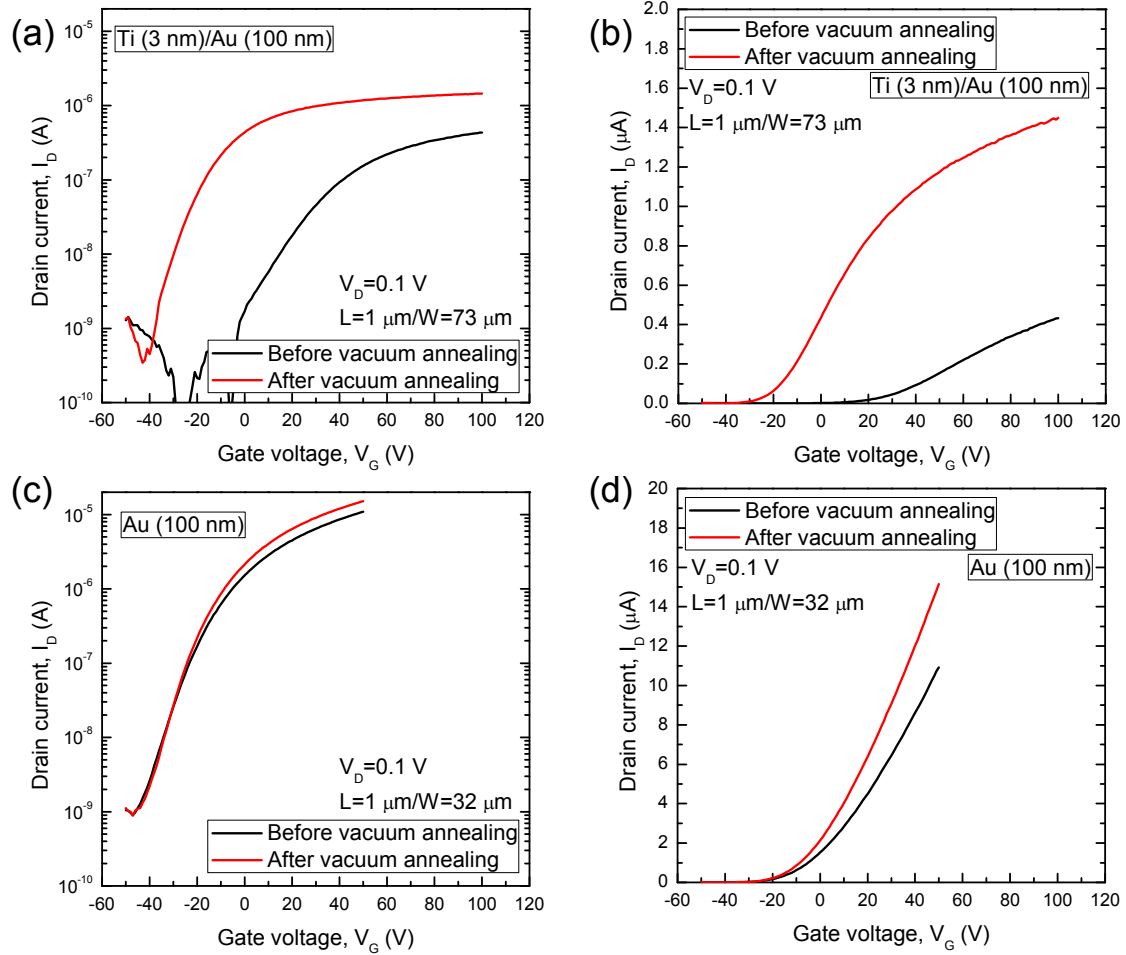

**Figure S2.** Electrical characteristics of monolayer MoS<sub>2</sub> FETs with different contact materials before and after vacuum annealing (400 K for ~12hr), measured at a pressure of  $6.0 \times 10^{-8}$  Torr. (a)-(b) a MoS<sub>2</sub> FET with Ti/Au contact (3 nm /100 nm). (c)-(d) a MoS<sub>2</sub> FET with Au contact (100 nm).

### Mechanism of the non-monotonic dependence of threshold voltage on pressure

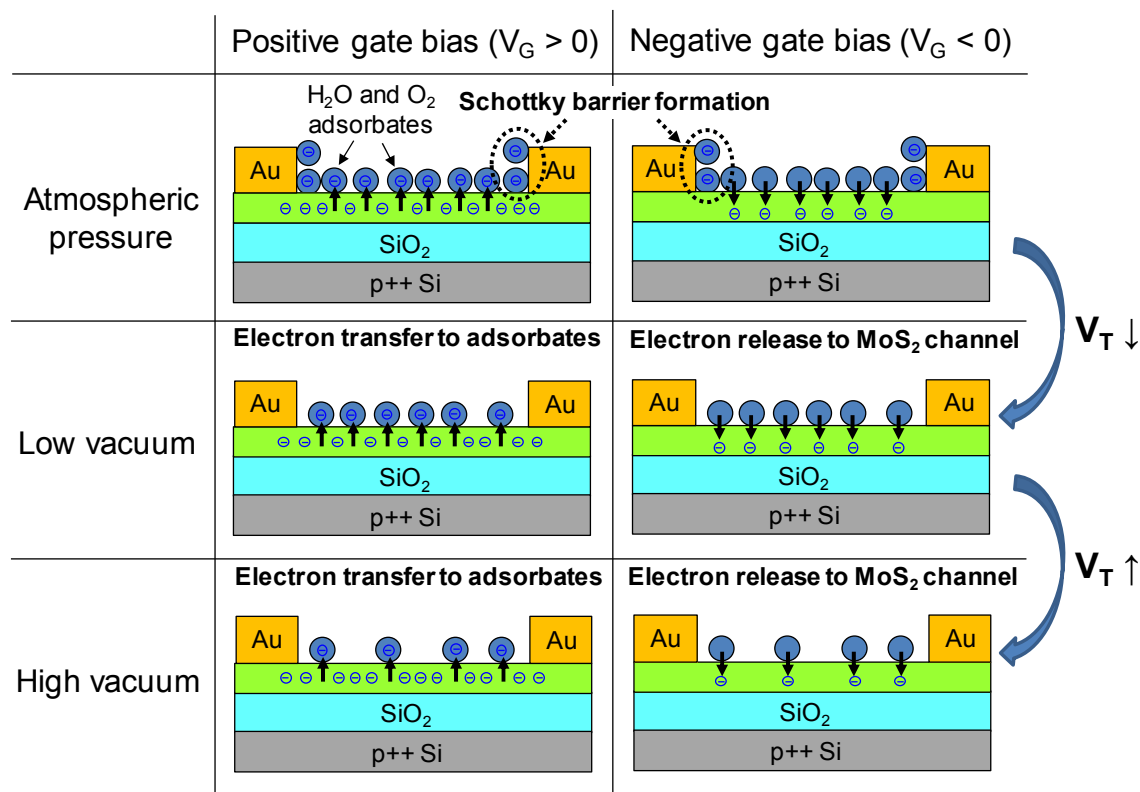

**Figure S3.** Schematics to explain the non-monotonic dependence of threshold voltage on pressure. As the water and oxygen molecules adsorbates near MoS<sub>2</sub>-Au electrodes are desorbed, the contacts are changed from Schottky contacts to ohmic contacts, resulting in the the reduction of threshold voltage. Under high vacuum condition, the lower trap density reduces the number of carriers that can be released back to the channel when a negative gate voltage is applied, resulting in a decreased drain current and an increased threshold voltage.

## Hysteresis in a top-gated monolayer MoS<sub>2</sub> FET

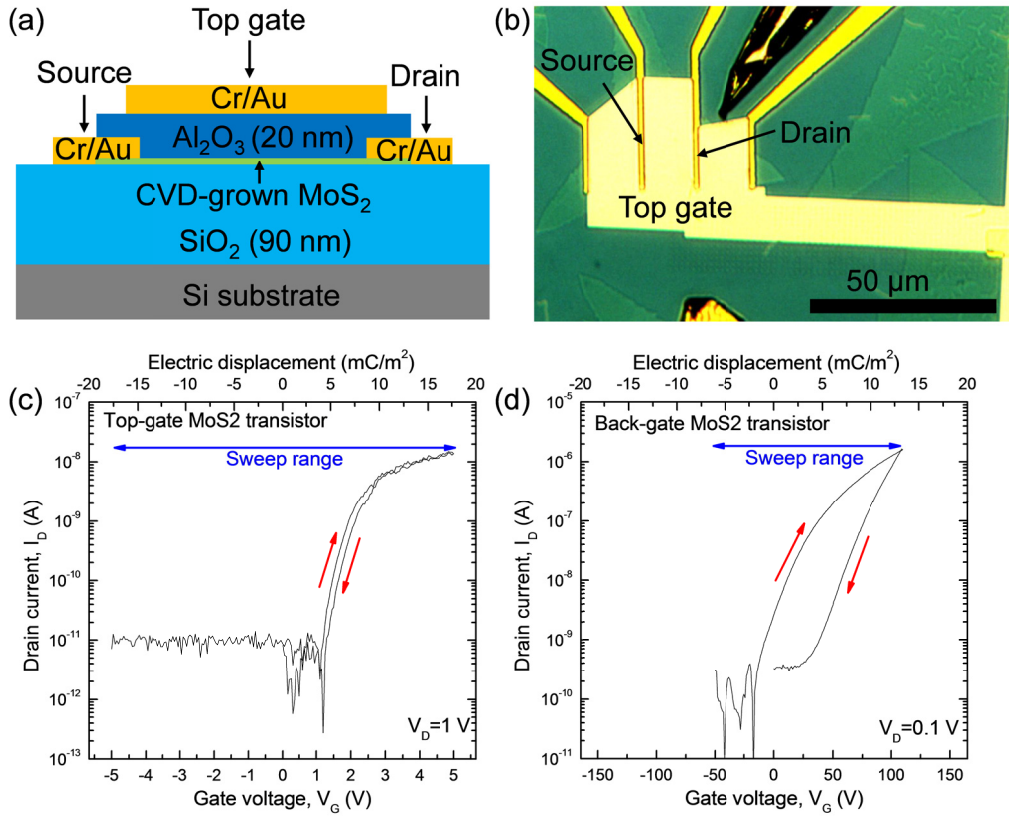

**Figure S4.** Comparison of the transfer characteristics ( $I_D$ - $V_G$ ) hysteresis between top-gated and back-gated MoS<sub>2</sub> FETs. Schematic (a) and optical image (b) of the top-gated MoS<sub>2</sub> FET. Transfer ( $I_D$ - $V_G$ ) characteristics of the top-gated MoS<sub>2</sub> FET (c) and the back-gated MoS<sub>2</sub> FET (d). The back-gated device had no passivation on top, leaving the top surface of the MoS<sub>2</sub> channel exposed to ambient, unlike the top-gated device. The data for the back-gated device is from Figure 2(a) in the main text. For a fair comparison of hysteresis, the x-axis of the  $I_D$ - $V_G$  curve is rescaled with the same electric displacement by considering the 20 nm-thick Al<sub>2</sub>O<sub>3</sub> ( $\epsilon_r=8.0$ ) and 285 nm-thick SiO<sub>2</sub> ( $\epsilon_r=3.9$ ) for the top-gated and back-gated devices, respectively. Smaller hysteresis is observed in the top-gated MoS<sub>2</sub> FET even with the large sweep range.

## Reduction of hysteresis after vacuum annealing

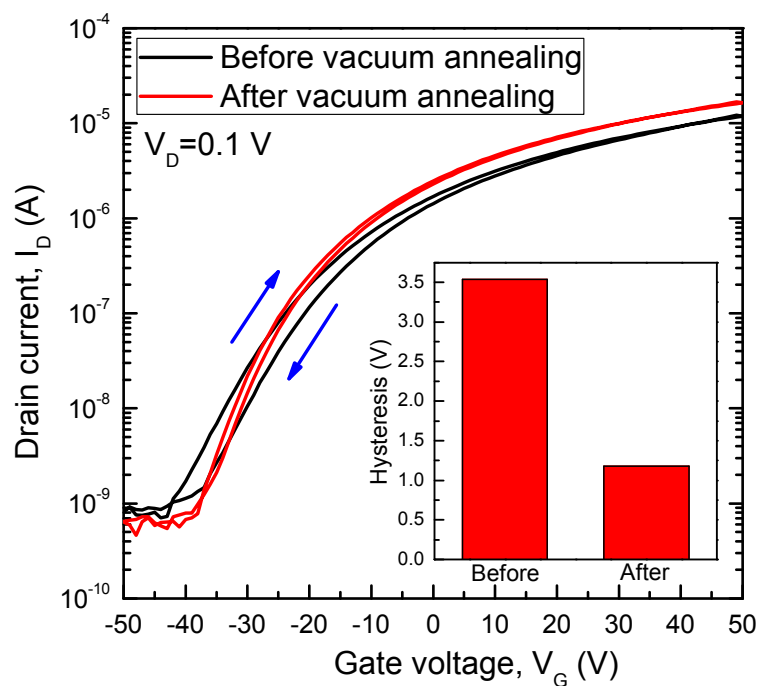

**Figure S5.** Comparison of the transfer characteristics ( $I_D$ - $V_G$ ) hysteresis before and after vacuum annealing (400 K for ~12hr), measured at a pressure of  $6.0 \times 10^{-8}$  Torr. Smaller hysteresis is shown after vacuum annealing.

### Acceptor-type, shallow traps produced by the absorbed gas molecules

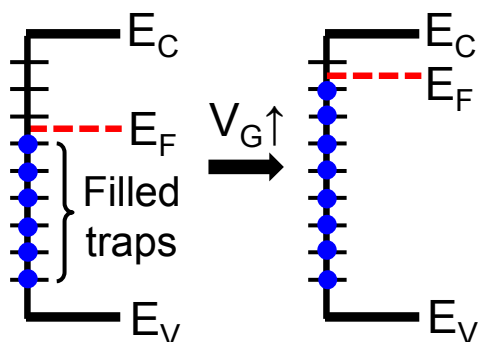

**Figure S6.** Schematic of energy band of the MoS<sub>2</sub> channel with absorbed water and oxygen molecules as interface traps filled with electrons below the Fermi level ( $E_F$ ). The Fermi level is moved toward the conduction band with increasing gate voltage ( $V_G$ ).

As shown in Fig. 2a in the main text, we observed the clockwise direction of the hysteresis in the  $I_D$ - $V_G$  characteristics of the MoS<sub>2</sub> FETs: a lower threshold voltage in the forward gate sweep and a higher threshold voltage in the reverse gate sweep. From this experimental result, we can understand that the interface traps produced by the absorbed gas molecules are acceptor-type traps [1] that become negatively charged in a such way that the trap energy levels below the Fermi level ( $E_F$ ) are filled by electrons (Fig. S5). The electrons in the MoS<sub>2</sub> channel can be transferred into the interface traps at positive gate bias, resulting in the increased threshold voltage of the reverse sweep. Then, the captured electrons can be released again to the MoS<sub>2</sub> channel at negative gate bias, resulting in the decreased threshold voltage for the forward sweep.

As the gate voltage is increased, the Fermi level ( $E_F$ ) is moved toward the conduction band ( $E_C$ ) and the interface traps at that energy level close to the conduction band is involved in the extraction of the interface trap density. Large difference of the interface trap density for the two ambient conditions with increasing gate voltage ( $V_G$ ) as observed in Fig. 3b in the main text suggests that the interface traps are mainly located at shallow energy levels close to conduction band, which are typically called as shallow traps [1].

## Effects of vacuum annealing on the contact resistance and mobility

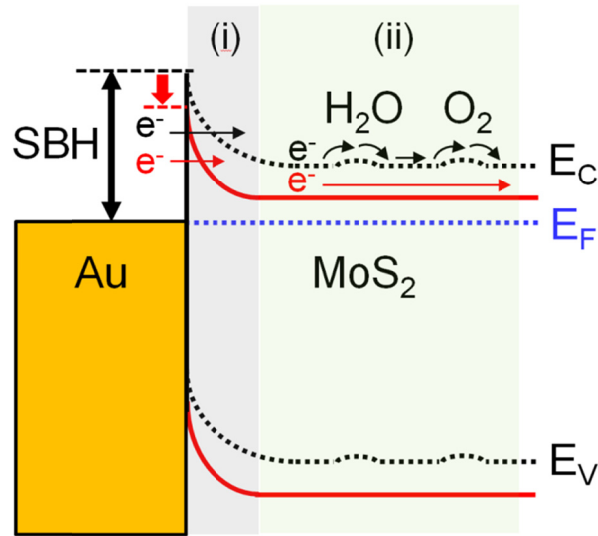

**Figure S7.** Energy band diagram along the MoS<sub>2</sub> channel and the Au contact before and after removal of water and oxygen molecules. When the absorbed gases that capture the electrons from the MoS<sub>2</sub> channel are detached by vacuum annealing, (i) the contact resistance is reduced due to a narrower tunneling width and reduced Schottky barrier height (SBH), and (ii) the mobility is improved due to a lower density of scattering centers and interface traps on the MoS<sub>2</sub> channel.

Based on a transfer length method (TLM) measurement, we observed the decreased MoS<sub>2</sub>-metal contact resistance and the increased mobility of the MoS<sub>2</sub> channel after vacuum annealing (Fig. 4b in the main text). These experimental results can be further explained as followed.

As water and oxygen molecules are desorbed from the MoS<sub>2</sub>-metal contacts by vacuum annealing, electrons that are initially transferred to the molecules in the on-state regime are now returned to the MoS<sub>2</sub> channel, inducing channel doping. In the energy band diagram as depicted in Fig. S7, the Fermi level (E<sub>F</sub>) is moved up toward the conduction band (E<sub>C</sub>) after removal of water and oxygen molecules due to channel doping. This leads to the reduction of the Schottky barrier height (SBH) defined as the difference between the interfacial conduction band and the Fermi level. Consequently, a lower contact resistance is expected because of a narrower tunneling width and reduced Schottky barrier height as shown in Fig. S7. In addition, the mobility is increased due to a lower density of molecules on the MoS<sub>2</sub> channel surface which serve as scattering centers or interface traps (Fig. S7).



## References

- [1] Sze, S. M. & Ng, K. K. *Semiconductor Devices: Physics and Technology*. (Wiley, 2002).
